# Supplementary material for: A sulphide resistant Ag|AgCl reference electrode for long-term monitoring
Source: Royal Society of Chemistry journal article supplement (doi:10.1039/d4an01076k), 2024-01-01
Supplement: d4an01076k1.pdf [file d4an01076k1.pdf]

## Supplementary information for

# A sulphide resistant Ag|AgCl reference electrode for long-term monitoring

David S. Macedo<sup>a,b,\*</sup>, Mikko Vepsäläinen<sup>c,\*</sup>, Theo Rodopoulos<sup>a</sup>, Stephen Peacock<sup>a</sup>, Conor F. Hogan<sup>b</sup>

<sup>a</sup>Mineral Resources, CSIRO, Melbourne, Victoria 3168, Australia.

<sup>b</sup>Department of Biochemistry and Chemistry, La Trobe University, Melbourne, Victoria 3086, Australia.

<sup>c</sup>Technical Research Centre of Finland, VTT, Espoo, Finland.

\*Email: [david.macedo@csiro.au](mailto:david.macedo@csiro.au), [mikko.vepsalainen@vtt.fi](mailto:mikko.vepsalainen@vtt.fi)

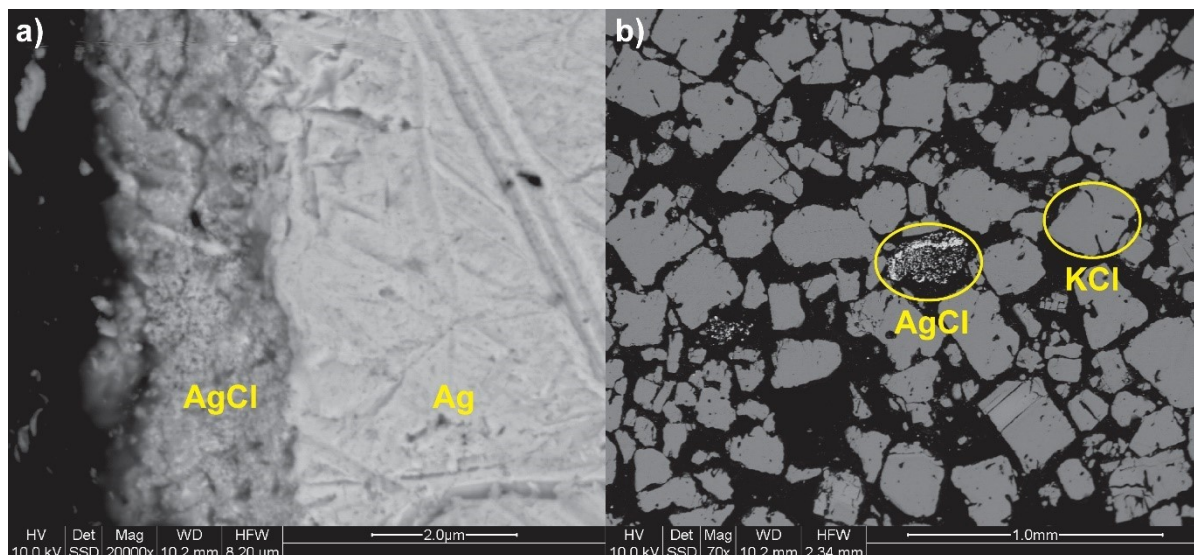

S1: BS-SEM images of cross-sections of a) Ag|AgCl wire, and b) unconditioned KCl/AgCl polymer composite.

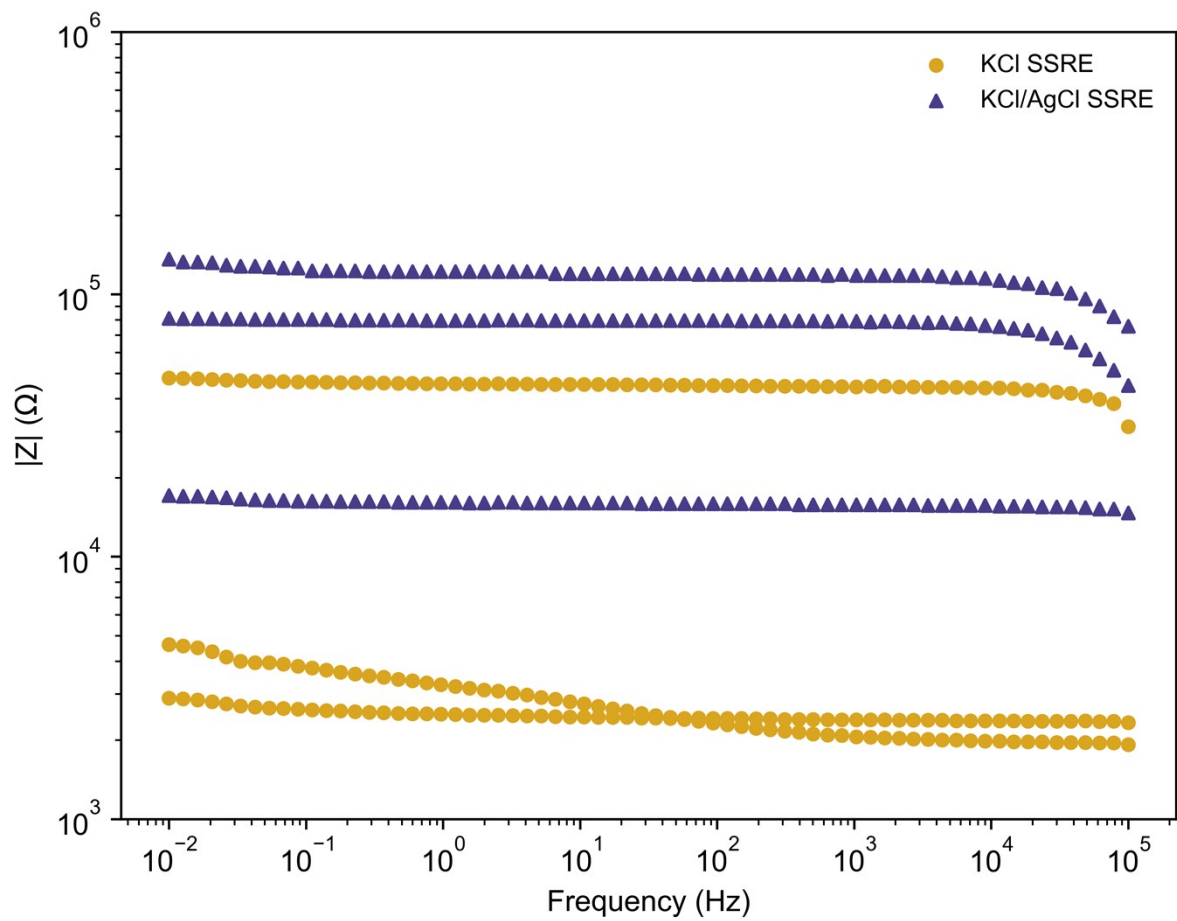

S2: Bode plot with magnitude of impedance for KCl SSRE and KCl/AgCl SSRE replicate electrodes.

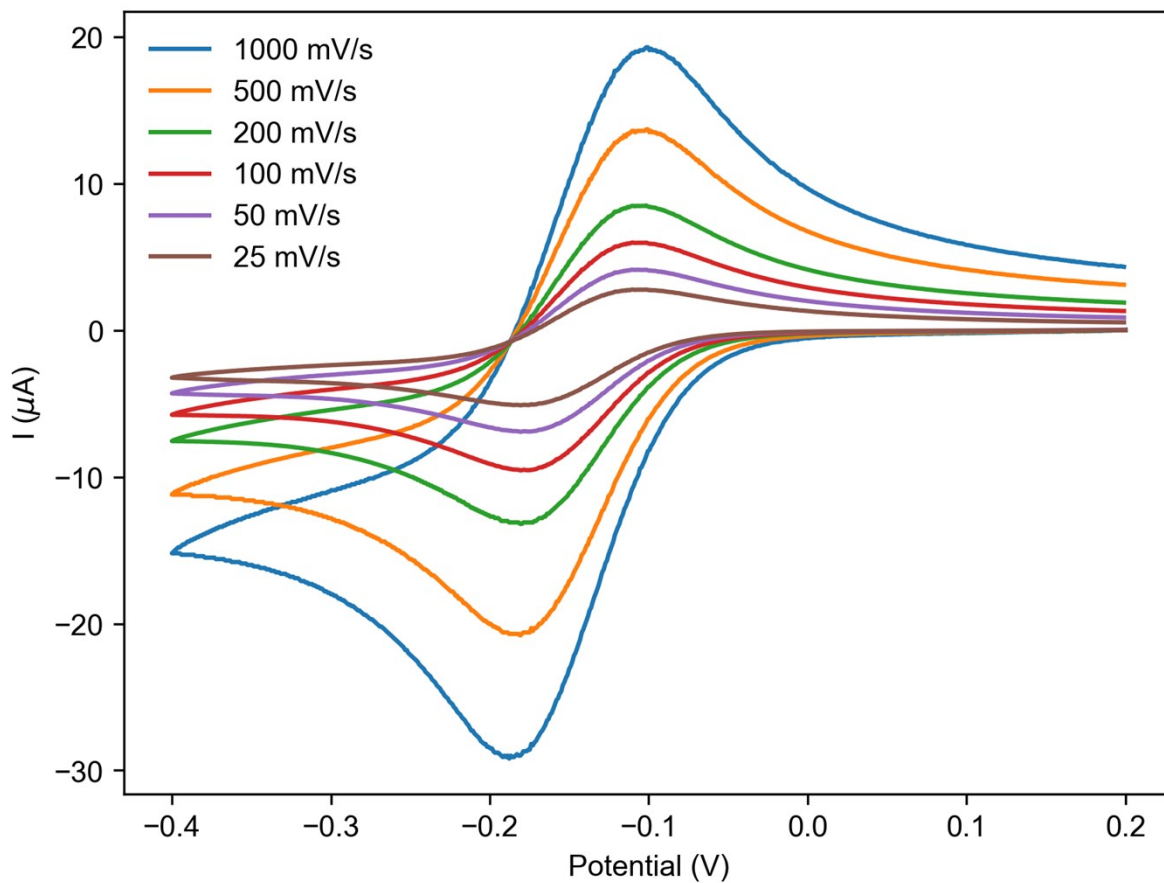

S3: Cyclic voltammograms with 5 mM  $[\text{Ru}(\text{NH}_3)_6]\text{Cl}_3$  and 0.2 M KCl supporting electrolyte using a 1 mm diameter GC electrode and liquid filled reference electrode.

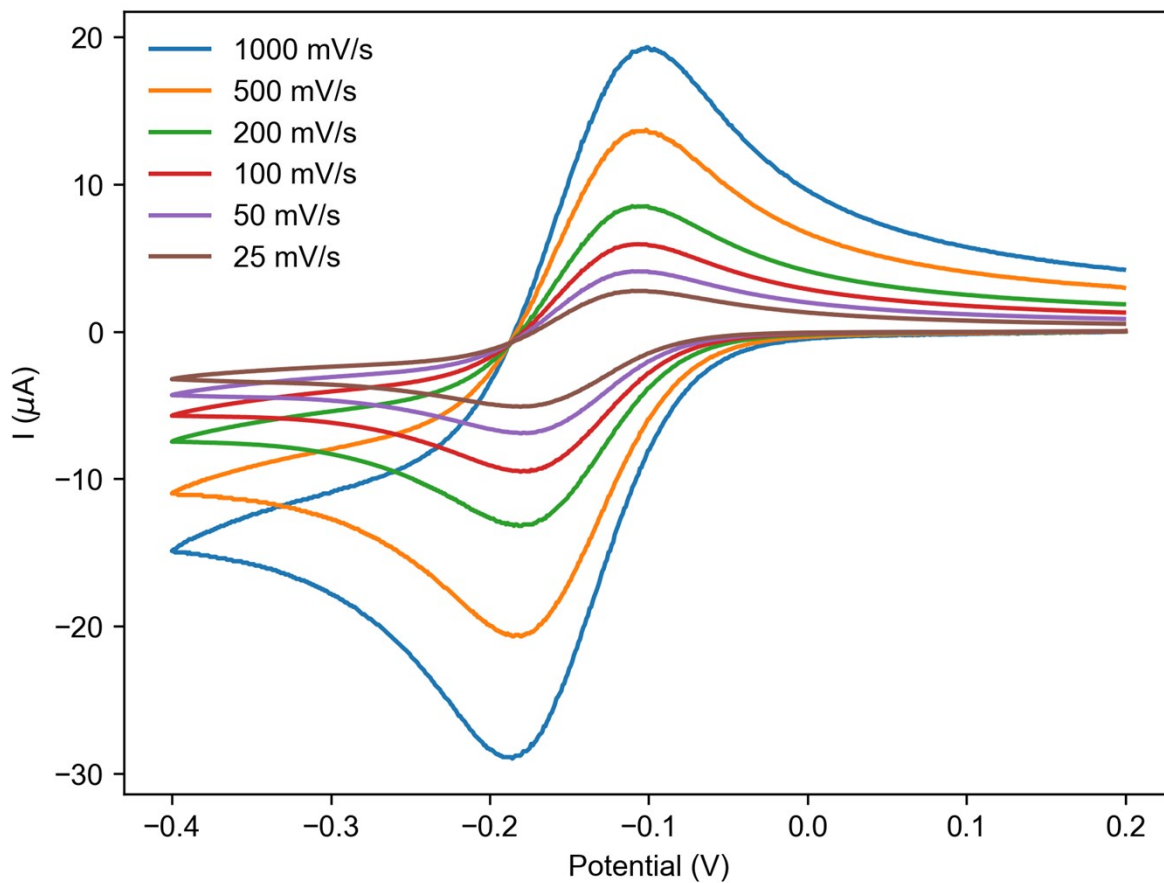

S4: Cyclic voltammograms with 5 mM  $[\text{Ru}(\text{NH}_3)_6]\text{Cl}_3$  and 0.2 M KCl supporting electrolyte using a 1 mm diameter GC electrode and KCl SSRE.

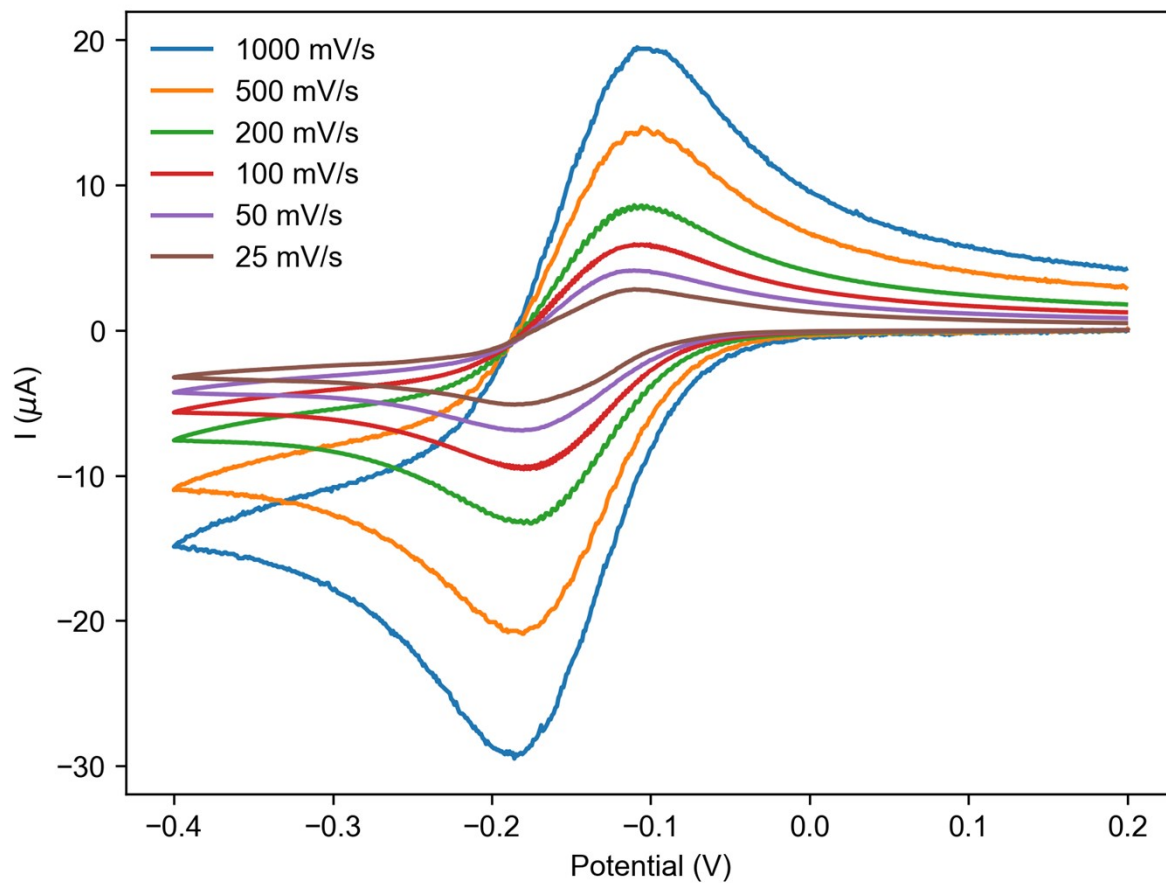

S5: Cyclic voltammograms with 5 mM  $[\text{Ru}(\text{NH}_3)_6]\text{Cl}_3$  and 0.2 M KCl supporting electrolyte using a 1 mm diameter GC electrode and KCl/AgCl SSRE.

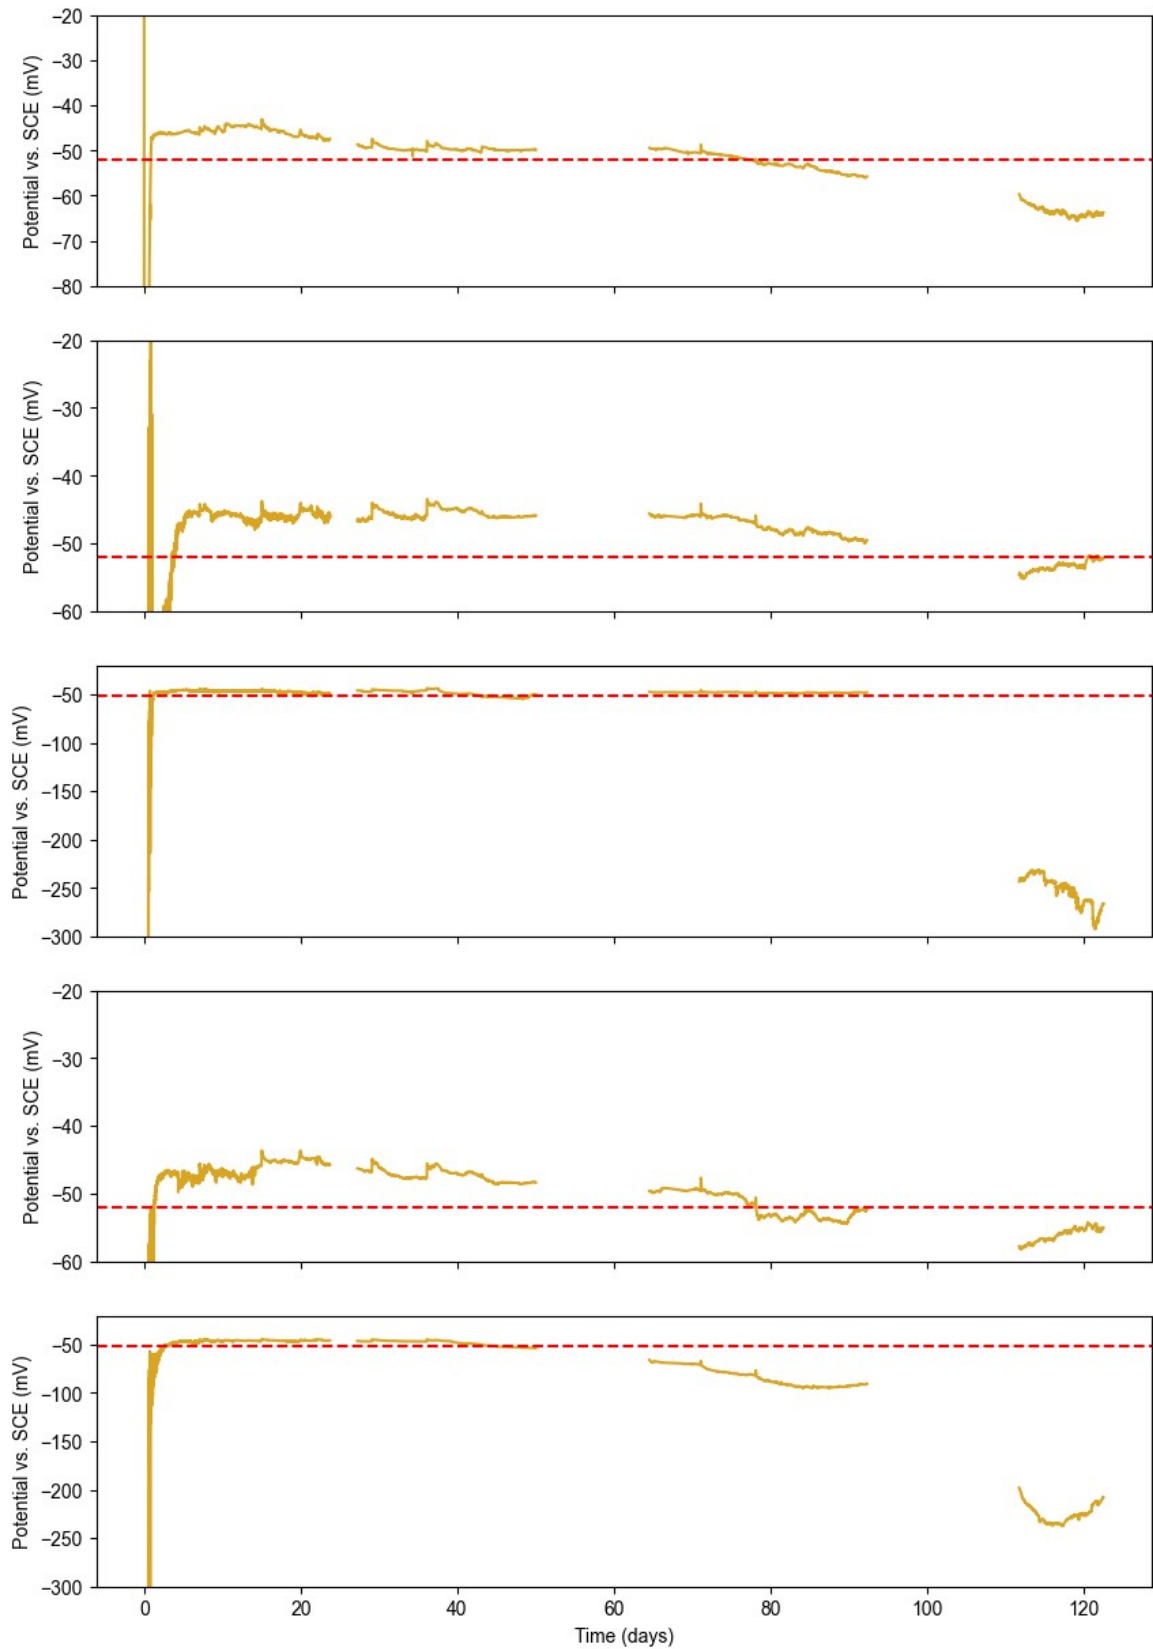

S6: Individual OCP traces for KCl SSREs in 1g/L Na<sub>2</sub>S solution. The red dashed reference line is 5 mV under the -47 mV literature value and was used for assessing stabilisation and failure time.

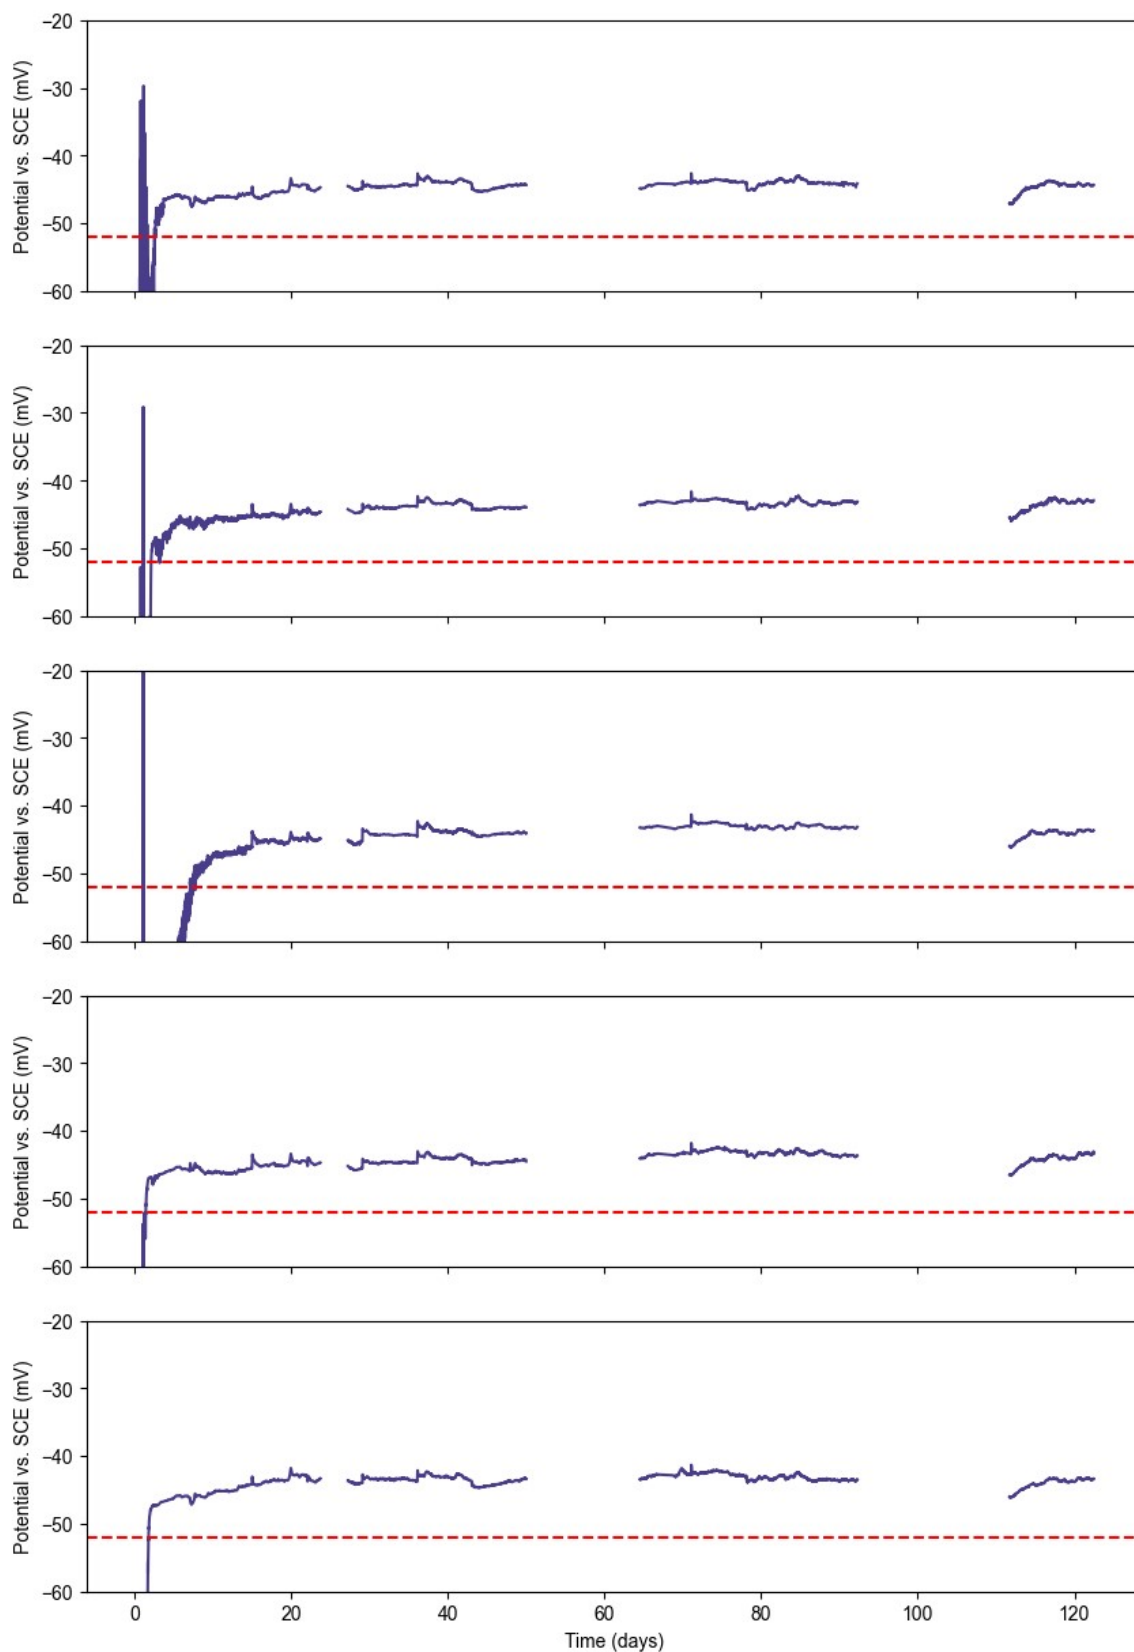

S7: Individual OCP traces for KCl/AgCl SSREs in 1g/L Na<sub>2</sub>S solution. The red dashed reference line is 5 mV under the -47 mV literature value and was used for assessing stabilisation and failure time.
